# Supplementary material for: Controllable growth of highly N-doped carbon nanotubes from imidazole: a structural, spectroscopic and field emission study
Source: Royal Society of Chemistry journal article supplement (doi:10.1039/b923139k), 2010-01-01
Supplement: b923139k.pdf [file b923139k.pdf]

Supplementary Material (ESI) for Journal of Materials Chemistry  
This journal is (c) The Royal Society of Chemistry 2010

Controllable growth of highly N-doped carbon nanotubes from imidazole:  
Structural, spectroscopic and field emission study

Kaushik Ghosh, Mukul Kumar,<sup>\*</sup> Takahiro Maruyama, Yoshinori Ando  
*Department of Materials Science and Engineering Meijo University, Nagoya 468-8502, Japan*

Supporting Information

---

<sup>\*</sup> E-mail: [mukul@ccmfs.meijo-u.ac.jp](mailto:mukul@ccmfs.meijo-u.ac.jp)

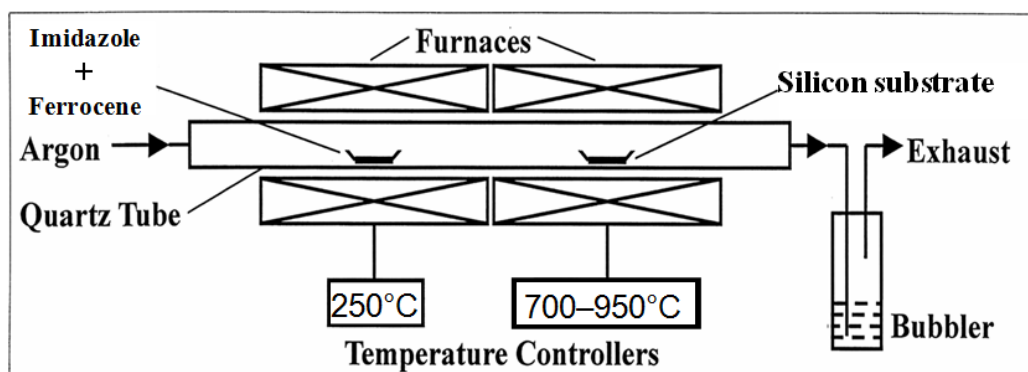

Fig. S1 A schematic diagram of the experimental set-up used for synthesizing N-doped CNTs.

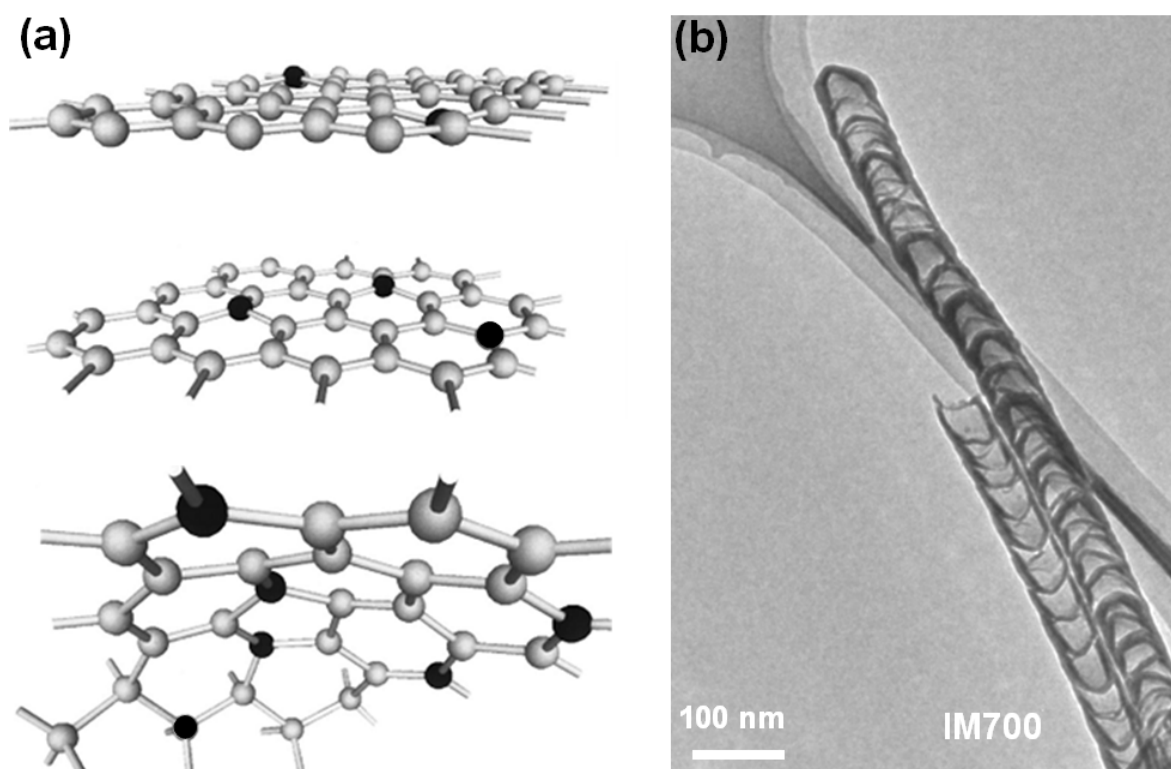

Fig. S2 (a) A model showing gradual increase in the curvature due to successive gN incorporation in a planar graphite layer. (b) Imidazole-grown CN<sub>x</sub> synthesized at 700°C contains maximum pN-content (see Fig. 2b) and consequently possesses stacked-cup morphology.

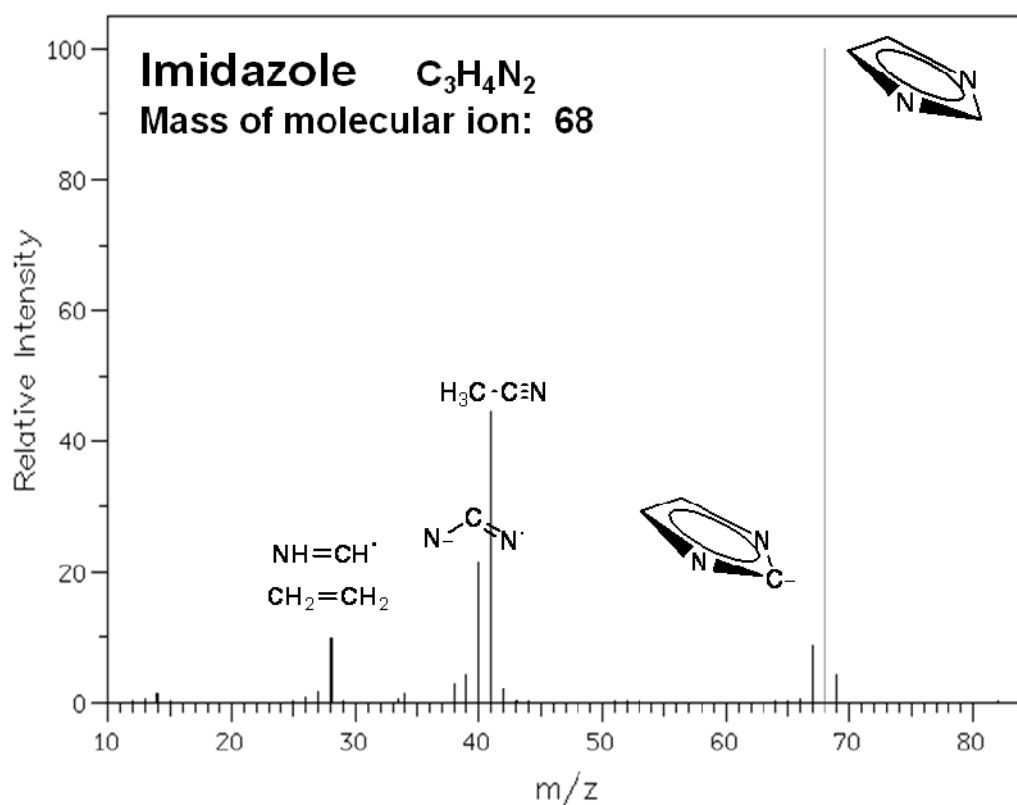

Fig. S3 Gas-chromatographic mass spectra of imidazole pyrolysis.

Table S1- Relative intensities of probable fragments as calculated from the above GCMS.

| Mol. Wt. | Intensity | Probable fragments          |
|----------|-----------|-----------------------------|
| 28       | 10%       | $H_2C=CH_2$<br>$HN=CH\cdot$ |
| 39       | 4%        |                             |
| 40       | 22%       | $N=C-N\cdot$                |
| 41       | 45%       | $CH_3-CN$                   |
| 67       | 9%        | $-C_3H_3N_2$                |
| 68       | 100%      | $C_3H_4N_2$                 |

Fig. S3 shows the GC-MS spectra of imidazole pyrolysis at 270°C. The spectrum reveals that there are a number of small fragmented units such as: C-C, C-N, N-C-N, C-C-N and  $C_3N_2^-$ ; accompanied with more than 50% undecomposed imidazole present in the gas mixture. The recombination of the smaller fragments on the catalyst surface could result the hexagonal and pentagonal carbon ring, where each of which should contain at least one nitrogen atom as a substituent element. We could believe that with the increase of pyrolysis temperature up to 850°C the rate of fragmentation of imidazole precursor is relatively much easier to supply the higher quantities of C-N units. As a result, the nitrogen doping level in  $CN_x$  matrix have significantly been improved to 25.7 at.%.

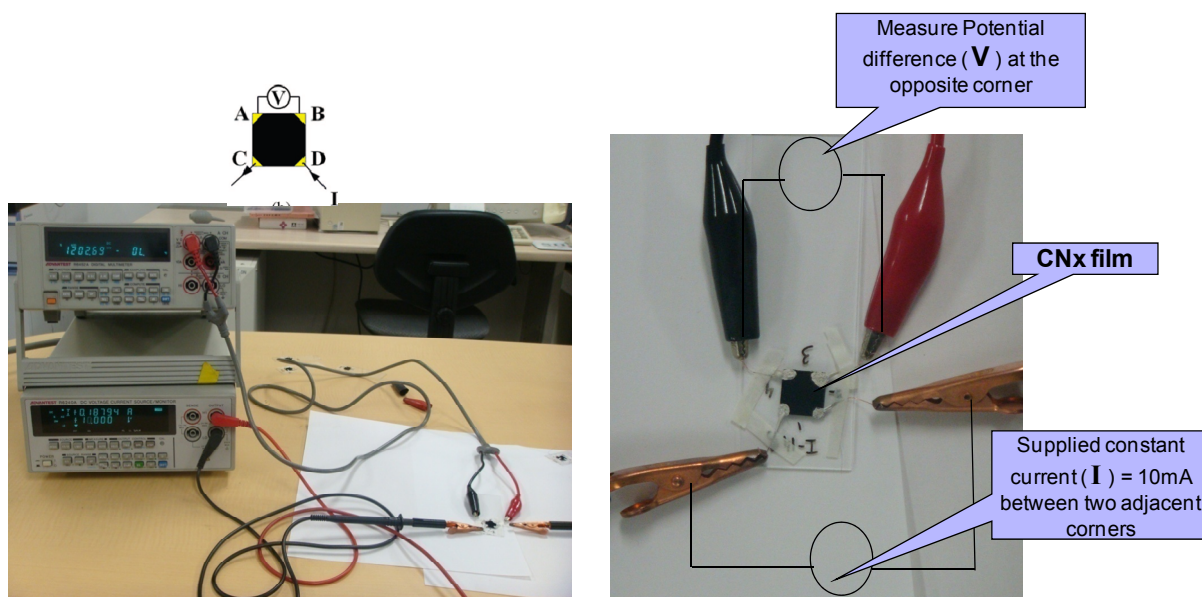

Fig. S4 Standard four-probe van der Pauw technique was used for the sheet resistance measurement of  $CN_x$  films.
